# Supplementary material for: Streamlined Direct Image Transmission via Plastic Optical Fiber for Automotive Applications
Source: Research Square preprint supplement (doi:10.21203/rs.3.rs-7317870/v1), 2025-08-18
Supplement: Supplementary file 1 [file ab199f038edb9bc3fc21c0cf.pdf]

Supplementary information

| Class | POF length<br>L (m)     | Target<br>image | 0.1 m | 0.5 m | 1 m | 5 m | 10 m |
|-------|-------------------------|-----------------|-------|-------|-----|-----|------|
| 0     | Scrambled<br>images     |                 |       |       |     |     |      |
|       | Reconstructed<br>images |                 |       |       |     |     |      |
| 1     | Scrambled<br>images     |                 |       |       |     |     |      |
|       | Reconstructed<br>images |                 |       |       |     |     |      |
| 2     | Scrambled<br>images     |                 |       |       |     |     |      |
|       | Reconstructed<br>images |                 |       |       |     |     |      |
| 3     | Scrambled<br>Images     |                 |       |       |     |     |      |
|       | Reconstructed<br>images |                 |       |       |     |     |      |
| 4     | Scrambled<br>images     |                 |       |       |     |     |      |
|       | Reconstructed<br>images |                 |       |       |     |     |      |
| 5     | Scrambled<br>images     |                 |       |       |     |     |      |
|       | Reconstructed<br>images |                 |       |       |     |     |      |
| 6     | Scrambled<br>images     |                 |       |       |     |     |      |
|       | Reconstructed<br>images |                 |       |       |     |     |      |
| 7     | Scrambled<br>images     |                 |       |       |     |     |      |
|       | Reconstructed<br>images |                 |       |       |     |     |      |
| 8     | Scrambled<br>images     |                 |       |       |     |     |      |
|       | Reconstructed<br>images |                 |       |       |     |     |      |
| 9     | Scrambled<br>images     |                 |       |       |     |     |      |
|       | Reconstructed<br>images |                 |       |       |     |     |      |

Supplementary figure 1 Example results for all class for various POF lengths (grayscale image)

| Class | POF length<br>$L$ (m)   | Target<br>image                                                                     | 0.1 m                                                                               | 0.5 m                                                                               | 1 m                                                                                 | 5 m                                                                                 | 10 m                                                                                |
|-------|-------------------------|-------------------------------------------------------------------------------------|-------------------------------------------------------------------------------------|-------------------------------------------------------------------------------------|-------------------------------------------------------------------------------------|-------------------------------------------------------------------------------------|-------------------------------------------------------------------------------------|
| 0     | Scrambled<br>images     |                                                                                     |    |    |    |    |    |
|       | Reconstructed<br>images |    |    |    |    |    |    |
| 1     | Scrambled<br>images     |                                                                                     |    |    |    |    |    |
|       | Reconstructed<br>images |    |    |    |    |    |    |
| 2     | Scrambled<br>images     |                                                                                     |    |    |    |    |    |
|       | Reconstructed<br>images |    |    |    |    |    |    |
| 3     | Scrambled<br>Images     |                                                                                     |    |    |    |    |    |
|       | Reconstructed<br>images |    |    |    |    |    |    |
| 4     | Scrambled<br>images     |                                                                                     |    |    |    |    |    |
|       | Reconstructed<br>images |   |   |   |   |   |   |
| 5     | Scrambled<br>images     |                                                                                     |  |  |  |  |  |
|       | Reconstructed<br>images |  |  |  |  |  |  |
| 6     | Scrambled<br>images     |                                                                                     |  |  |  |  |  |
|       | Reconstructed<br>images |  |  |  |  |  |  |
| 7     | Scrambled<br>images     |                                                                                     |  |  |  |  |  |
|       | Reconstructed<br>images |  |  |  |  |  |  |
| 8     | Scrambled<br>images     |                                                                                     |  |  |  |  |  |
|       | Reconstructed<br>images |  |  |  |  |  |  |
| 9     | Scrambled<br>images     |                                                                                     |  |  |  |  |  |
|       | Reconstructed<br>images |  |  |  |  |  |  |

**Supplementary figure 2** Example results for all class for various POF lengths (color image)
